# Supplementary material for: Prevalence, Risk Factors and Course of Osteoporosis in Patients with Crohn’s Disease at a Tertiary Referral Center
Source: PubMed Central journal article supplement (PMC6947604; doi:10.3390/jcm8122178), 2019-12-10
Supplement: jcm-08-02178-s001.pdf [file jcm-08-02178-s001.pdf]

## Supplementary:

**Table S1:** Baseline characteristics of all included patients  $\geq 2$  DXA scans

| Variable                                                             | <i>n</i> = 233                  |
|----------------------------------------------------------------------|---------------------------------|
| Male, <i>n</i> (%)                                                   | 103 (44.2)                      |
| Age at diagnose of IBD (years), median (range)                       | 23 (8–66)                       |
| Age at first DXA scan (years), median (range)                        | 36 (18–77)                      |
| Montreal classification of CD:                                       |                                 |
| Age, <i>n</i> (A1:A2:A3)                                             | 25:187:21                       |
| Location, <i>n</i> (L1:L2:L3:L4), <i>n</i> = 232                     | 63:35:134:22                    |
| Behaviour, <i>n</i> (B1:B2:B3), <i>n</i> = 231                       | 65:56:110                       |
| Disease duration at first DXA scan (years), median (range)           | 9 (0–42)                        |
| Presence of at least one extraintestinal manifestation, <i>n</i> (%) | 126 (54.1)                      |
| Active cigarette smoking at first DXA scan, <i>n</i> = 221 (%)       | 85 (36.5)                       |
| BMI (kg/m <sup>2</sup> ), mean $\pm$ SD (range)                      | 23.8 $\pm$ 4.8 (14.6–43.1)      |
| History of anti-TNF $\alpha$ treatment, <i>n</i> (%)                 | 44 (18.9)                       |
| History of anti-integrin treatment, <i>n</i> (%)                     | 1 (0.4)                         |
| History of anti-interleukin treatment, <i>n</i> (%)                  | 0 (0)                           |
| History of immunomodulator treatment, <i>n</i> (%)                   | 79 (33.9)                       |
| History of bowel resection(s), <i>n</i> (%)                          | 173 (74.2)                      |
| Short bowel syndrome, <i>n</i> (%)                                   | 6 (2.6)                         |
| Ostomy, <i>n</i> (%)                                                 | 17 (7.3)                        |
| BMD, mean $\pm$ SD (range)                                           | 0.887 $\pm$ 0.128 (0.609–1.224) |
| BMD lumbar spine, mean $\pm$ SD (range)                              | 0.939 $\pm$ 0.141 (0.623–1.423) |
| BMD femur, mean $\pm$ SD (range)                                     | 0.836 $\pm$ 0.146 (0.440–1.277) |
| BMD according to T-score of WHO                                      |                                 |
| Normal BMD:osteopenia:osteoporosis ( <i>n:n:n</i> )                  | 59:112:62                       |
| Number of DXA scans per patient                                      |                                 |
| 2, <i>n</i> (%)                                                      | 73 (31.3)                       |
| 3, <i>n</i> (%)                                                      | 54 (23.2)                       |
| 4, <i>n</i> (%)                                                      | 39 (16.7)                       |
| 5, <i>n</i> (%)                                                      | 27 (11.6)                       |
| 6, <i>n</i> (%)                                                      | 11 (4.7)                        |
| 7, <i>n</i> (%)                                                      | 8 (3.4)                         |
| 8, <i>n</i> (%)                                                      | 9 (3.9)                         |
| 9, <i>n</i> (%)                                                      | 6 (2.6)                         |
| 10, <i>n</i> (%)                                                     | 2 (0.9)                         |
| 11, <i>n</i> (%)                                                     | 3 (1.3)                         |
| 12, <i>n</i> (%)                                                     | 1 (0.4)                         |

BMD: bone mineral density; BMI: body mass index; CD: Crohn's disease; DXA: dual energy X-ray absorptiometry; SD: standard deviation; TNF $\alpha$ : tumor necrosis factor alpha; WHO: world health organization; Montreal classification of Crohn's disease: A1: age < 16 years; A2: age 17–40 years; A3: age > 40 years; L1: location ileal; L2: location colonic; L3: location ileal and colonic; L4: location upper gastrointestinal tract; B1: non-stricturing non penetrating behavior; B2: stricturing behavior; B3: penetrating behavior.

**Table S2.** Comparison of baseline characteristics between the subgroups of patients with osteoporosis versus those without osteoporosis in patients  $\geq 2$  DXA scans.

| Variable                                                             | Osteoporosis<br><i>n</i> = 62 | No Osteoporosis<br><i>n</i> = 171 | <i>p</i> -Value     |
|----------------------------------------------------------------------|-------------------------------|-----------------------------------|---------------------|
| Male, <i>n</i> (%)                                                   | 34 (54.8)                     | 69 (40.4)                         | 0.049 <sup>1</sup>  |
| Age at diagnosis of CD (years), median (range)                       | 23.5 (8–66)                   | 23 (9–58)                         | 0.210 <sup>2</sup>  |
| Age at first DXA scan (years), median (range)                        | 43 (18–77)                    | 34 (18–67)                        | 0.025 <sup>2</sup>  |
| <b>Montreal classification of CD:</b>                                |                               |                                   |                     |
| Age                                                                  |                               |                                   | 0.001 <sup>1</sup>  |
| A1                                                                   | 7 (11.3)                      | 18 (10.5)                         |                     |
| A2                                                                   | 42 (67.7)                     | 145 (84.8)                        |                     |
| A3                                                                   | 13 (21.0)                     | 8 (4.7)                           |                     |
| Location                                                             |                               |                                   | 0.289 <sup>1</sup>  |
| L1                                                                   | 20 (32.8)                     | 43 (25.1)                         |                     |
| L2                                                                   | 6 (9.8)                       | 29 (17.0)                         |                     |
| L3                                                                   | 35 (57.4)                     | 99 (57.9)                         |                     |
| L4                                                                   | 2 (3.3)                       | 20 (11.7)                         | 0.054 <sup>1</sup>  |
| Behaviour                                                            |                               |                                   | 0.937 <sup>1</sup>  |
| B1                                                                   | 18 (29.0)                     | 47 (27.8)                         |                     |
| B2                                                                   | 14 (22.6)                     | 42 (24.9)                         |                     |
| B3                                                                   | 30 (48.4)                     | 80 (47.3)                         |                     |
| Disease duration at first DXA scan (years), median (range)           | 10 (0–42)                     | 8 (0–39)                          | 0.290 <sup>2</sup>  |
| Presence of at least one extraintestinal manifestation, <i>n</i> (%) | 30 (48.4)                     | 96 (56.1)                         | 0.294 <sup>1</sup>  |
| Active cigarette smoking at first DXA scan, <i>n</i> (%)             | 23 (38.3)                     | 62 (38.5)                         | 0.981 <sup>1</sup>  |
| BMI (kg/m <sup>2</sup> ), mean $\pm$ SD (range)                      | 21.2 $\pm$ 4.0 (14.6–31.1)    | 24.7 $\pm$ 4.7 (15.2–43.1)        | <0.001 <sup>2</sup> |
| History of anti-TNF $\alpha$ treatment, <i>n</i> (%)                 | 12 (18.7)                     | 32 (19.4)                         | 0.912 <sup>1</sup>  |
| History of anti-integrin treatment, <i>n</i> (%)                     | 1 (1.6)                       | 0 (0)                             | 0.096 <sup>1</sup>  |
| History of immunomodulator treatment, <i>n</i> (%)                   | 22 (35.5)                     | 57 (33.3)                         | 0.759 <sup>1</sup>  |
| History of bowel resection(s), <i>n</i> (%)                          | 51 (82.3)                     | 122 (71.3)                        | 0.092 <sup>1</sup>  |
| Short bowel syndrome, <i>n</i> (%)                                   | 5 (8.1)                       | 1 (0.6)                           | 0.001 <sup>1</sup>  |
| Ostomy, <i>n</i> (%)                                                 | 7 (11.3)                      | 10 (5.8)                          | 0.158 <sup>1</sup>  |

BMI: body mass index; CD: Crohn's disease; DXA: dual energy X-ray absorptiometry; SD: standard deviation; TNF $\alpha$ : Tumor necrosis factor alpha; <sup>1</sup> Chi-squared test; <sup>2</sup> Mann-Whitney-test; Montreal classification of Crohn's disease: A1: age < 16 years; A2: age 17–40 years; A3: age > 40 years; L1: location ileal; L2: location colonic; L3: location ileal and colonic; L4: location upper gastrointestinal tract; B1: non-stricturing non penetrating behavior; B2: stricturing behavior; B3: penetrating behavior
